# Supplementary material for: miR-31 targets ARID1A and enhances the oncogenicity and stemness of head and neck squamous cell carcinoma
Source: Oncotarget. 2016 Aug 9;7(35):57254–67. doi: 10.18632/oncotarget.11138 (PMC5302987; doi:10.18632/oncotarget.11138)
Supplement: Supplementary file 1 [file oncotarget-07-57254-s001.pdf]

## ***miR-31* targets ARID1A and enhances the oncogenicity and stemness of head and neck squamous cell carcinoma**

### **SUPPLEMENTARY FIGURES AND TABLES**

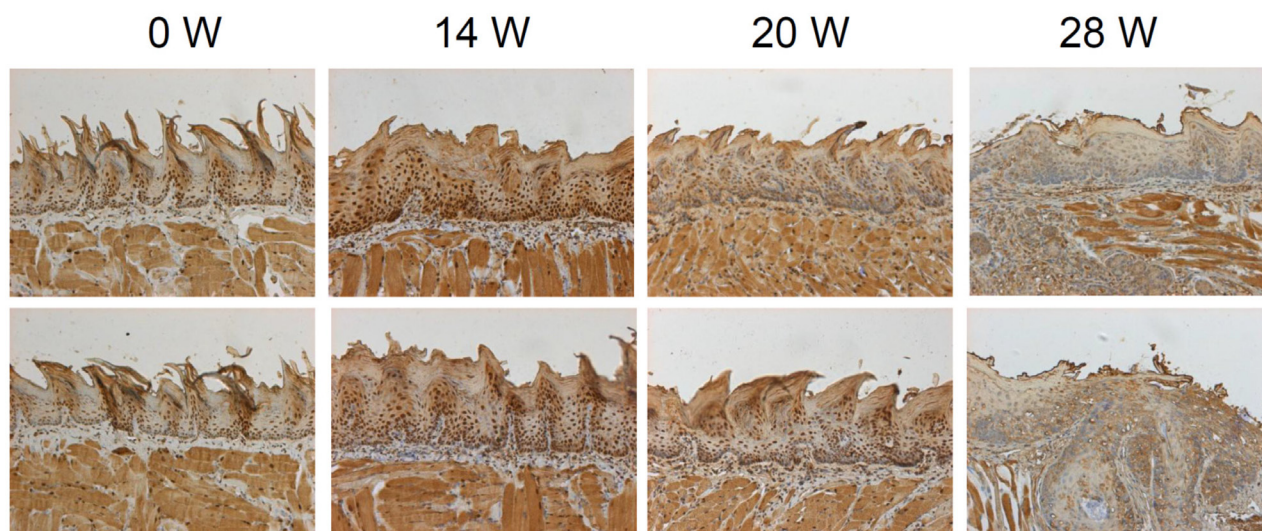

**Supplementary Figure S1: ARID1A immunoreactivity in mouse multistep carcinogenesis.** Mouse tongue tissues upon 4NQO treatment for 0, 14, 20 and 28 weeks. (x100). Upper panels and lower panels are from different mice. Except for the Rt Lowest panel, which is an invasive tumor, all other panels are normal looking mucosa. Note the nuclear and cytosolic immunoreactivity in epithelial cells. The nuclear ARID1A immunoreactivity scored as percentage are summarized in Supplementary Figure 1A, Rt.

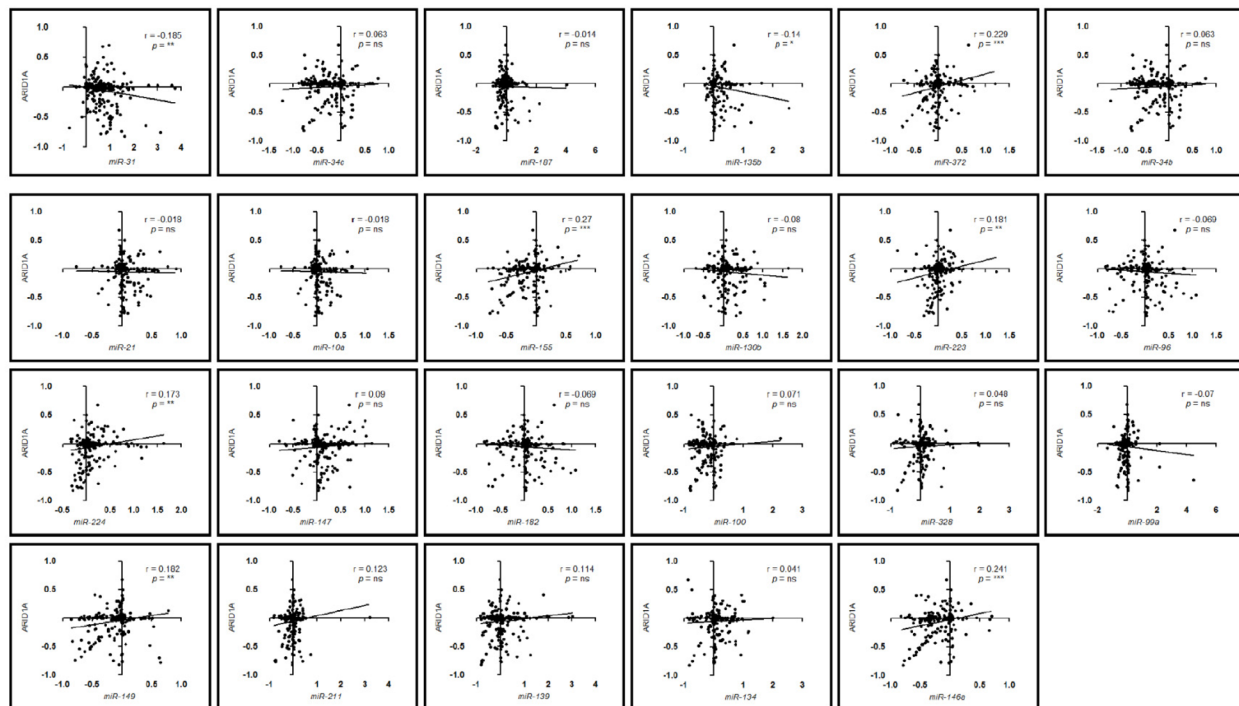

**Supplementary Figure S2: Correlation between the expression of oncogenic miRNAs and *ARID1A* mRNA expression in HNSCC TCGA database.** The algorithm of  $r$  values and the reverse correlation noted between *miR-31* and *ARID1A* are shown in Supplementary Figure 1E.

|              | miRWalk | miRanda | mirbridge | miRDB | miRNAMap | Pictar2 | PITA | RNA22 | Targetscan | DIANA |
|--------------|---------|---------|-----------|-------|----------|---------|------|-------|------------|-------|
| hsa-miR-31   | +       | +       | +         | +     | +        | +       | +    | +     | +          | +     |
| hsa-miR-135b | -       | -       | -         | -     | -        | -       | -    | +     | -          | -     |

**Supplementary Figure S3: Prediction of potential *miR-31* and *miR-135b* binding site in the 3'UTR of ARID1A gene.**  
 +, positive for a predicted binding; -, negative for a predicted binding.

**A**

| Cell                         | ARID1A 3'UTR                    |
|------------------------------|---------------------------------|
| OECM1, HSC3, FaDu, 293T, NOK | ATTTAATCTCTTGCCAGATATCGCCCC     |
| SAS                          | ATTTAATCTCTTGCCAGA[T/C]ATCGCCCC |

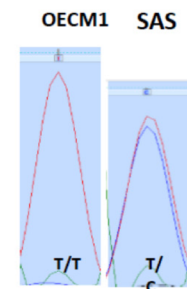**B**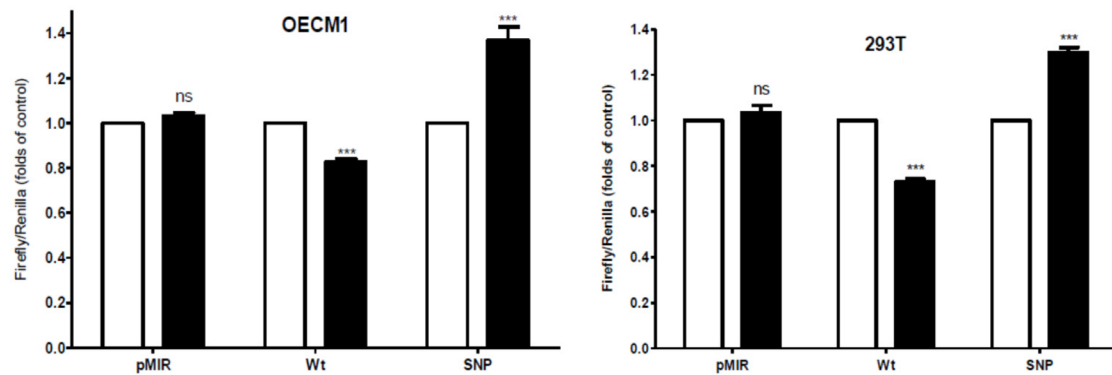

**Supplementary Figure S4: rs12685 polymorphism within ARID1A 3'UTR of SAS cells.** **A.** Lt, Summary of the 3'UTR sequence of ARID1A in various oral keratinocytes and 293T cells. Rt, Sequencing analysis reveals the presence of a heterozygous T/C sequence at nucleotide 999 within SAS cells. **B.** Assays of Wt and SNP reporters after treatment of *miR-31* mimic in OECM1 and 293T cells.

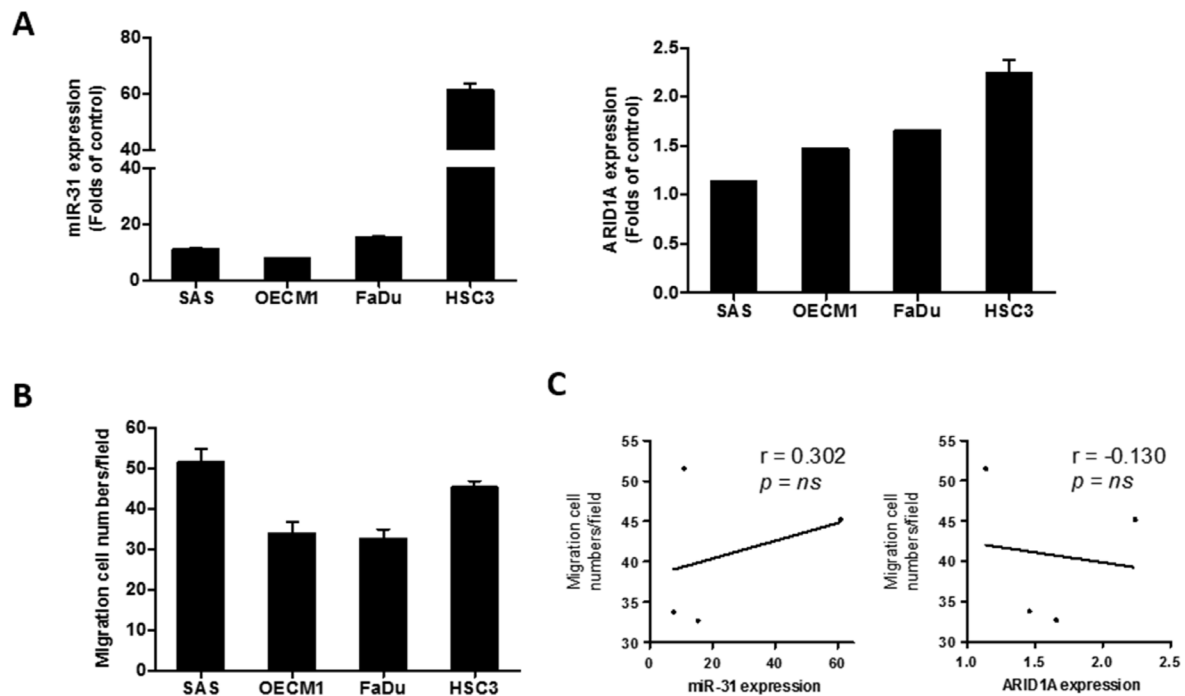

**Supplementary Figure S5: Correlation between the expression of *miR-31* and ARID1A and the migration ability in four HNSCC cell lines. A.** Endogenous *miR-31* expression (Lt) and ARID1A (Rt) expression. NOK is the control. **B.** Migration analysis. **C.** Linear regression analysis shows no correlation between cell migration and the expression level of *miR-31* (Lt) or ARID1A (Rt).

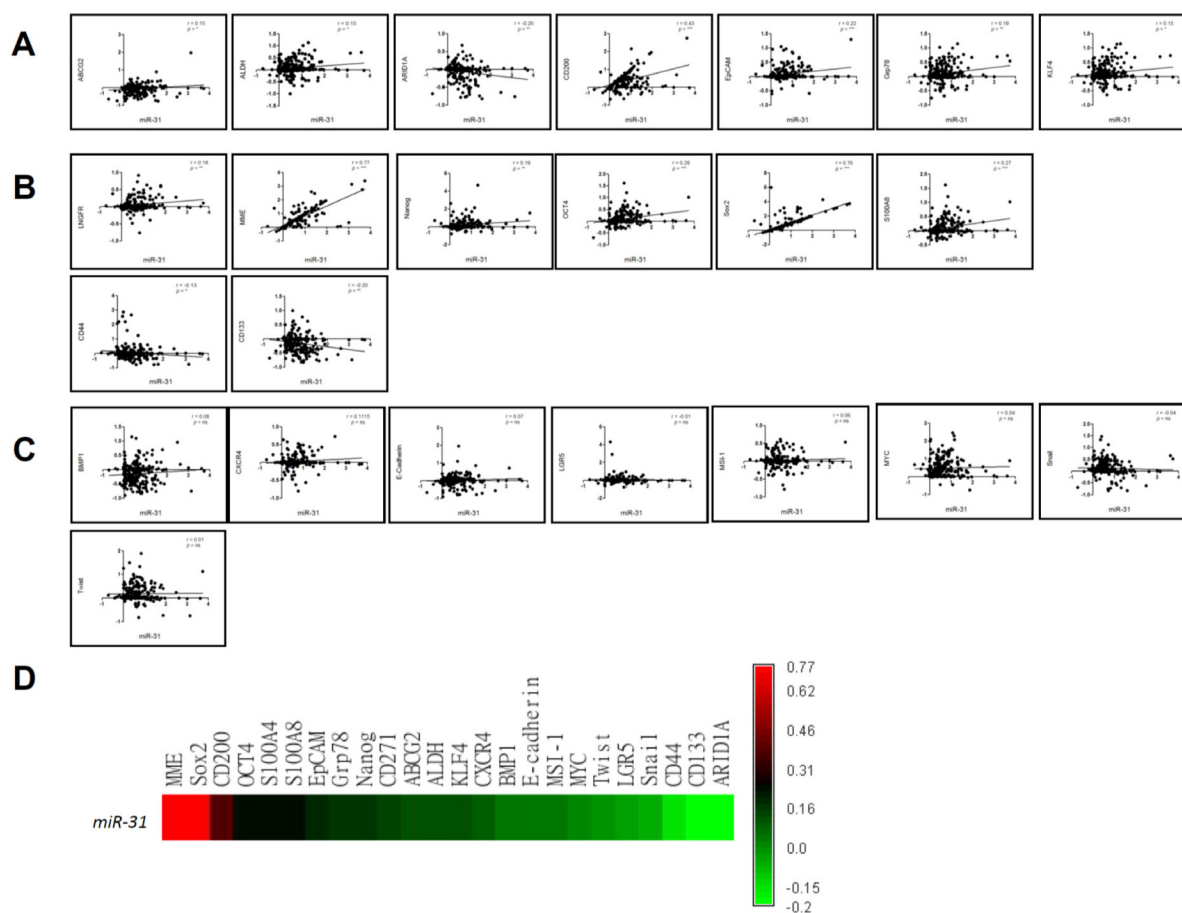

**Supplementary Figure S6: Correlation between the expression of stemness related genes and *miR-31* expression in HNSCC TCGA database. A. Genes with positive correlation. B. Genes with reverse correlation. C. Genes without correlation. D. An algorithm illustrating the  $r$  values of genes analyzed.**

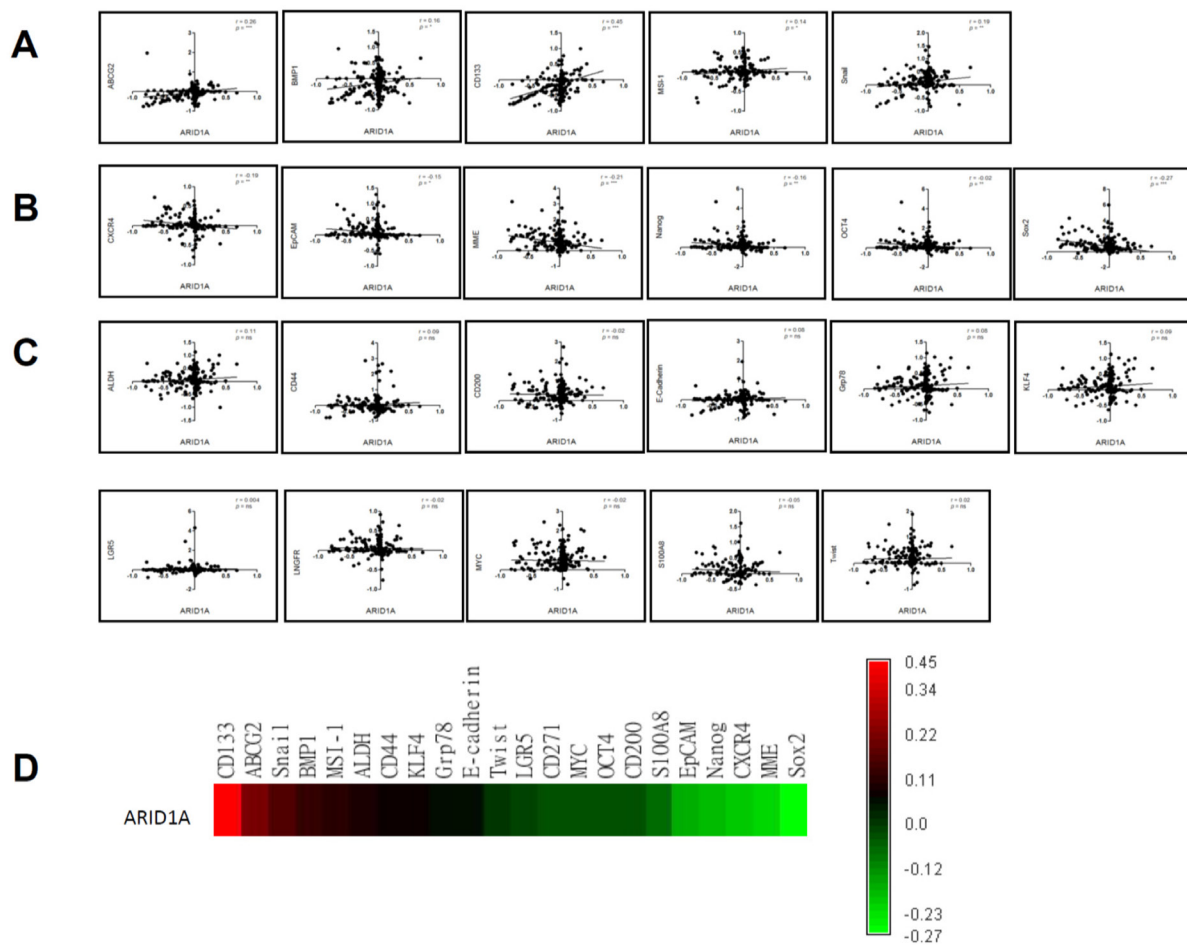

**Supplementary Figure S7: Correlation between the expression of stemness related genes and *ARID1A* expression in HNSCC TCGA database. A. Genes with positive correlation. B. Genes with reverse correlation. C. Genes without correlation. D. An algorithm illustrating the  $r$  values of genes analyzed.**

## AT-Rich Site Prediction

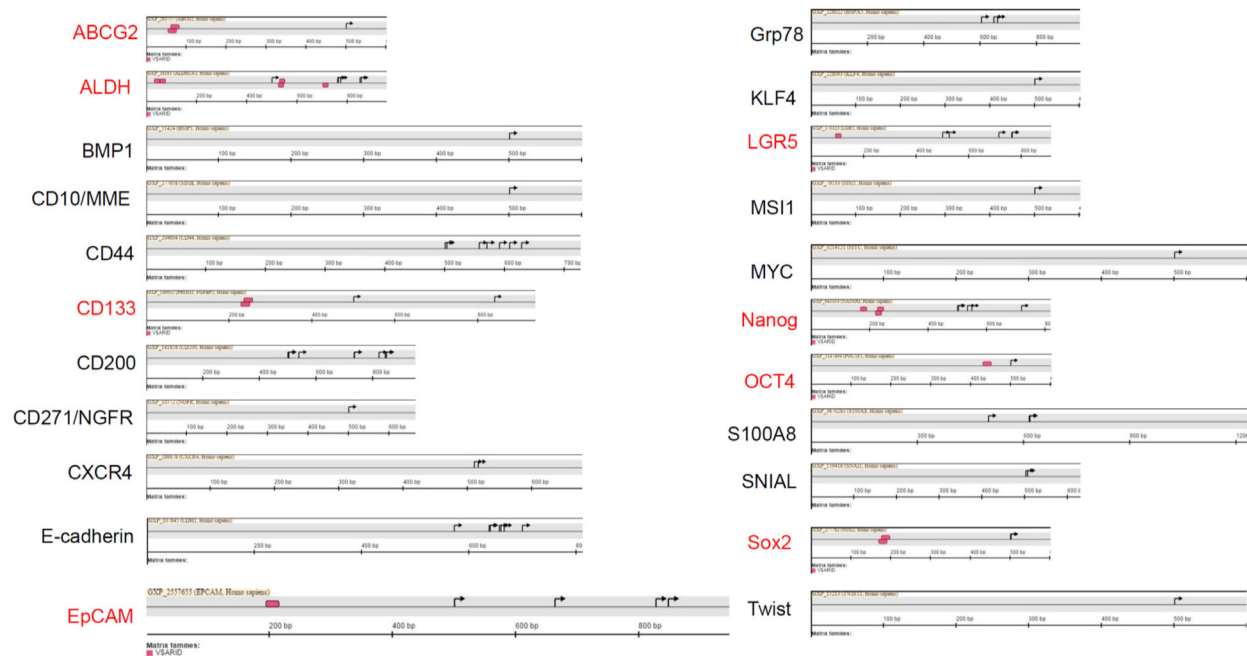

**Supplementary Figure S8: Prediction of AT-rich sites in promoters.** The prediction map of AT-rich binding site in -1000-TSS region in promoters of all genes. Predicted sites are marked in red boxes. Predicted genes are marked with red fonts.

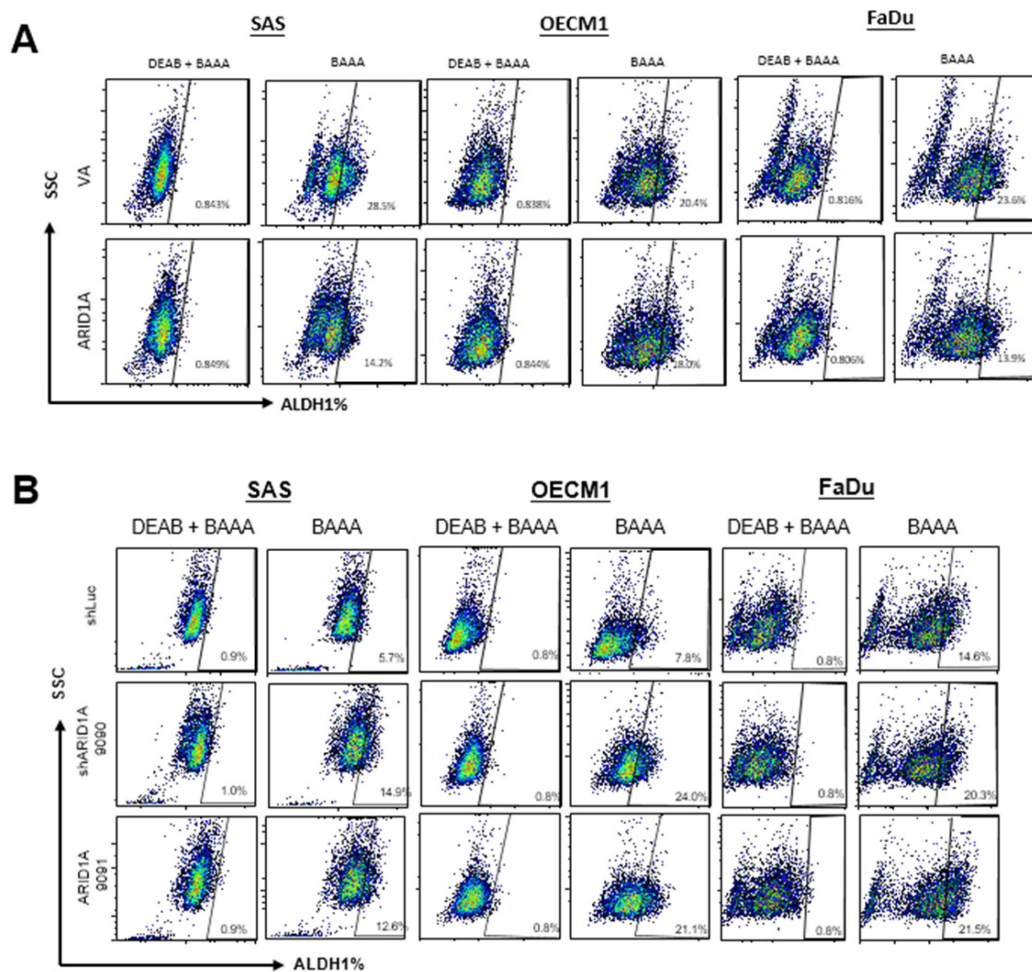

**Supplementary Figure S9: ARID1A suppresses stemness property in HNSCC cells. A, B.** The ALDEFLUOR assay. An increase or a decrease in the cell population with ALDH1 activity (ALDH1<sup>+</sup>) is noted for the SAS, OECM1 and FaDu cell subclones with ARID1A overexpression (in A) or knockdown (in B). The percentages are presented in the pictures.

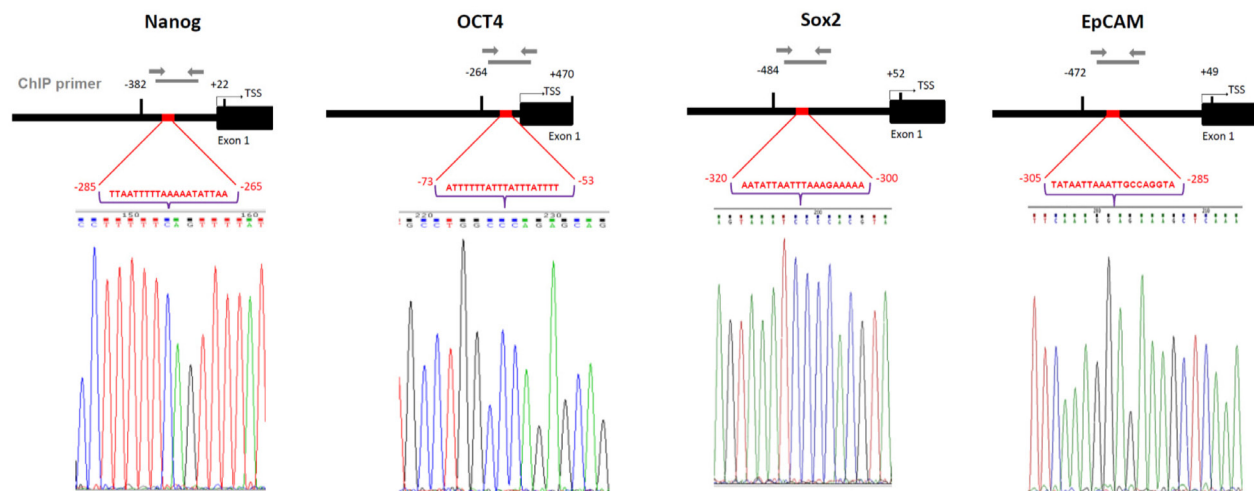

**Supplementary Figure S10: Prediction of AT-rich sites in Nanog/OCT4/Sox2/EpCAM promoter region.** Detailed diagrams designate AT-rich sites (Red boxes) in the proximal regions of the Nanog, OCT4, Sox2 and EpCAM promoters. TSS, transcription start site; Red bars, the termini of AT-rich sites. Black bars define the segments for reporter assay. Grey lines define the segments for ChIP assay. Bottom, the sequencing analysis demonstrated the deletion of AT-rich sites in Del reporter constructs.

**A**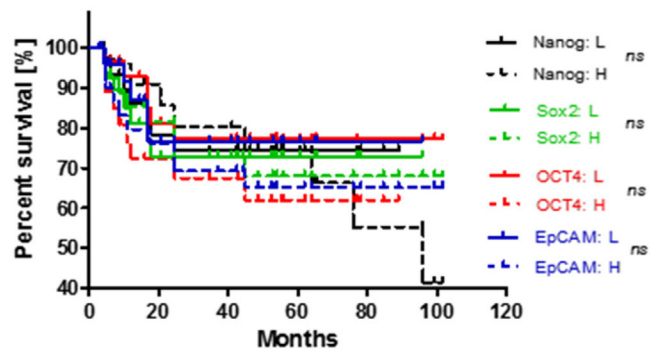**B**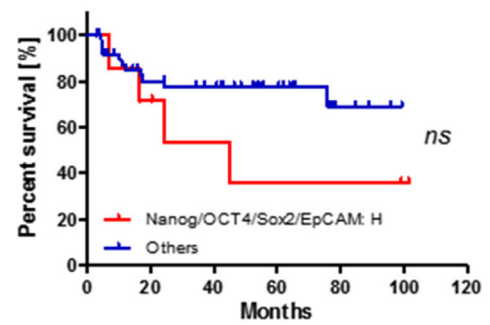

**Supplementary Figure S11: Disease free survival.** A. Analysis according to the expression of solitary pluripotency factor in tumor. B. Analysis according to the expression of all pluripotency factors in tumor. H, high expression; L, low expression.

**Supplementary Table S1: Clinicopathological parameters of paired OSCC for Western blot and qRT-PCR analysis**

| <i>n</i> =                | 58             |
|---------------------------|----------------|
| Age (Mean $\pm$ SE years) | 56.9 $\pm$ 1.4 |
| Gender (Male/Female)      | 52/6           |
| TNM staging               |                |
| T1-3                      | 24             |
| T4                        | 34             |
| N0                        | 38             |
| N+                        | 20             |
| Stage I                   | 8              |
| Stage II                  | 9              |
| Stage III                 | 7              |
| Stage IV                  | 34             |

**Supplementary Table S2: Clinicopathological parameters of OSCC TMA for IHC and ISH analysis**

| <i>n</i> =                | 60             |
|---------------------------|----------------|
| Age (Mean $\pm$ SE years) | 54.7 $\pm$ 1.6 |
| Gender (Male/Female)      | 52/8           |
| TNM staging               |                |
| T1-3                      | 17             |
| T4                        | 43             |
| N0                        | 42             |
| N+                        | 18             |
| Stage I                   | 4              |
| Stage II                  | 7              |
| Stage III                 | 6              |
| Stage IV                  | 43             |

Supplementary Table S3: Primary antibodies used in the present study

| Antibody            | MW (kDa) | Host   | Dilution | Supplier           | Cat. No.  |
|---------------------|----------|--------|----------|--------------------|-----------|
| ARID1A              | 240      | Rabbit | 1:3000   | Sigma-Aldrich      | HPA005456 |
| ARID1A*             | 240      | Rabbit | 1:200    | Sigma-Aldrich      | HPA005456 |
| ARID1A <sup>#</sup> | 240      | Mouse  | 1:200    | Santa Cruz Biotech | SC-32761X |
| Nanog               | 42/44    | Rabbit | 1:1000   | Cell Signaling     | 3580      |
| FIH                 | 40       | Goat   | 1:1000   | Santa Cruz Biotech | SC-26219  |
| Nanog*              | 35       | Rabbit | 1:100    | Abcam              | Ab109250  |
| OCT4                | 42/44    | Rabbit | 1:1000   | Cell Signaling     | 2750      |
| OCT4*               | 42/44    | Rabbit | 1:200    | Cell Signaling     | 2750      |
| Sox2                | 36       | Rabbit | 1:1000   | Cell Signaling     | 3579      |
| Sox2*               | 36       | Rabbit | 1:200    | Cell Signaling     | 3579      |
| KLF4                | 52       | Rabbit | 1:1000   | Abcam              | 151733    |
| GFP                 | 27       | Mouse  | 1: 5000  | Clontech Lab       | 632459    |
| Grp78               | 78       | Mouse  | 1:1000   | BD Biosciences     | 610979    |
| EpCAM               | 35       | Rabbit | 1:1000   | Abcam              | 71916     |
| EpCAM*              | 35       | Rabbit | 1:160    | Abcam              | 71916     |
| GAPDH               | 36       | Mouse  | 1:10000  | Santa Cruz Biotech | SC-32233  |

\*For IHC analysis.

<sup>#</sup>For ChIP assay.

Supplementary Table S4: shRNA utilized in the present study

| Symbol | Clone ID       | Clone Name           | Vector Name | Sequence              |
|--------|----------------|----------------------|-------------|-----------------------|
| shLuc  | TRCN0000072249 | promegaLuc_976s1c1   | pLKO.1      | GCGGTTGCCAAGAGGTTCCAT |
| ARID1A | TRCN0000059090 | NM_006015.3-1702s1c1 | pLKO.1      | CCTCTCTTATACACAGCAGAT |
| ARID1A | TRCN0000059091 | NM_006015.3-7163s1c1 | pLKO.1      | CCGTTGATGAACTCATTGGTT |

**Supplementary Table S5: Primers used in the present study**

See Supplementary File 1
